# Supplementary material
Source: publisher site journal article supplement (https://www.spandidos-publications.com/6395/downloadSupplementary)
Supplement: Supplementary file 1 [file downloadSupplementary]

## Sheet: Sheet 1
Table SV. Potential relationships between changes in the gut microbiome and changes in metabolic product concentrations.
Genus	Metabolite	Rho	P-value	Relationship
Linderina	neobavaisoflavone	-0.497201	2.56174e-07	negative
Ceratobasidium	kanzonol e	-0.490973	3.80023e-07	negative
Pseudarthrobacter	kanzonol e	-0.490953	3.80511e-07	negative
Saitoella	sophorapterocarpan a	-0.490741	3.85589e-07	negative
Roseovarius	kanzonol e	-0.486886	4.9019e-07	negative
Roseovarius	sophorapterocarpan a	-0.486144	5.13216e-07	negative
Holophagae_noname	pentylbenzene	-0.483777	5.93623e-07	negative
Pseudarthrobacter	sophorapterocarpan a	-0.482403	6.45674e-07	negative
Linderina	sophorapterocarpan a	-0.482192	6.54028e-07	negative
Crocosphaera	sophorapterocarpan a	-0.479559	7.6739e-07	negative
Holophagae_noname	kanzonol e	-0.478719	8.07314e-07	negative
Crocosphaera	kanzonol e	-0.478428	8.21643e-07	negative
Ceratobasidium	sophorapterocarpan a	-0.477947	8.45762e-07	negative
Diversispora	kanzonol e	-0.477282	8.80238e-07	negative
Syncephalis	sophorapterocarpan a	-0.47705	8.92568e-07	negative
Phanerochaete	sophorapterocarpan a	-0.476503	9.22334e-07	negative
Diversispora	sophorapterocarpan a	-0.475414	9.84374e-07	negative
Candidatus_Chloroploca	kanzonol e	-0.471173	1.26571e-06	negative
Oceanicella	kanzonol e	-0.470861	1.28919e-06	negative
Saitoella	dicaffeoylputrescine	-0.467628	1.55773e-06	negative
Candidatus_Hodgkinia	sophorapterocarpan a	-0.465078	1.80597e-06	negative
Eukaryota_unclassified	neobavaisoflavone	-0.464164	1.90369e-06	negative
Roseovarius	pentylbenzene	-0.463824	1.94136e-06	negative
Saitoella	kanzonol e	-0.463619	1.96438e-06	negative
Mortierella	kanzonol e	-0.462978	2.03804e-06	negative
Kangiella	sophorapterocarpan a	-0.462473	2.09792e-06	negative
Linderina	dicaffeoylputrescine	-0.461732	2.18873e-06	negative
Linderina	kanzonol e	-0.460833	2.304e-06	negative
Smittium	neobavaisoflavone	-0.46081	2.30702e-06	negative
Crocosphaera	dicaffeoylputrescine	-0.460619	2.33225e-06	negative
Crocosphaera	neobavaisoflavone	-0.460305	2.37426e-06	negative
Syncephalis	dicaffeoylputrescine	-0.458573	2.61939e-06	negative
Diversispora	pentylbenzene	-0.457605	2.76666e-06	negative
Basidiobolus	sophorapterocarpan a	-0.454892	3.22213e-06	negative
Roseovarius	dicaffeoylputrescine	-0.453897	3.40622e-06	negative
Ceratobasidium	dicaffeoylputrescine	-0.452789	3.62288e-06	negative
Pseudarthrobacter	dicaffeoylputrescine	-0.452625	3.65599e-06	negative
Mortierella	sophorapterocarpan a	-0.451755	3.83665e-06	negative
Schizosaccharomyces	sophorapterocarpan a	-0.448046	4.7058e-06	negative
Oceanicella	pentylbenzene	-0.447941	4.73295e-06	negative
Schizosaccharomyces	neobavaisoflavone	-0.44746	4.85912e-06	negative
Candidatus_Chloroploca	sophorapterocarpan a	-0.446831	5.02885e-06	negative
Eukaryota_unclassified	dicaffeoylputrescine	-0.446355	5.16081e-06	negative
Phanerochaete	dicaffeoylputrescine	-0.445503	5.40558e-06	negative
Pseudarthrobacter	pentylbenzene	-0.444819	5.60988e-06	negative
Ceratobasidium	pentylbenzene	-0.443925	5.88784e-06	negative
Candidatus_Hodgkinia	dicaffeoylputrescine	-0.443587	5.99626e-06	negative
Holophagae_noname	sophorapterocarpan a	-0.443189	6.12631e-06	negative
Smittium	sophorapterocarpan a	-0.442373	6.40132e-06	negative
Diversispora	dicaffeoylputrescine	-0.442251	6.44369e-06	negative
Saitoella	neobavaisoflavone	-0.441801	6.6013e-06	negative
Chlamydia	sophorapterocarpan a	-0.441427	8.41333e-06	negative
Mortierella	neobavaisoflavone	-0.440969	6.90223e-06	negative
Linderina	pentylbenzene	-0.440829	6.95408e-06	negative
Pseudarthrobacter	neobavaisoflavone	-0.439803	7.34558e-06	negative
Oceanicella	sophorapterocarpan a	-0.438834	7.73489e-06	negative
Eukaryota_unclassified	sophorapterocarpan a	-0.438037	8.06903e-06	negative
Ceratobasidium	neobavaisoflavone	-0.437995	8.08692e-06	negative
Chlamydia	kanzonol e	-0.43771	1.01694e-05	negative
Diversispora	sophoracoumestan a	-0.436578	8.71659e-06	negative
Crocosphaera	sophoracoumestan a	-0.436319	8.83656e-06	negative
Crocosphaera	pentylbenzene	-0.435282	9.33216e-06	negative
Smittium	dicaffeoylputrescine	-0.434737	9.60338e-06	negative
Saitoella	pentylbenzene	-0.432732	1.06651e-05	negative
Kangiella	dicaffeoylputrescine	-0.432316	1.08993e-05	negative
Roseovarius	neobavaisoflavone	-0.432128	1.10061e-05	negative
Mortierella	pentylbenzene	-0.430728	1.18363e-05	negative
Phanerochaete	neobavaisoflavone	-0.429873	1.23716e-05	negative
Spizellomyces	sophorapterocarpan a	-0.429308	1.27379e-05	negative
Pseudarthrobacter	sophoracoumestan a	-0.428906	1.30045e-05	negative
Kangiella	neobavaisoflavone	-0.428765	1.30992e-05	negative
Basidiobolus	pentylbenzene	-0.428664	1.31678e-05	negative
Eukaryota_unclassified	(cyclohexylmethyl)pyrazine	-0.428423	1.33318e-05	negative
Spizellomyces	pentylbenzene	-0.428069	1.35771e-05	negative
Phanerochaete	kanzonol e	-0.427632	1.38853e-05	negative
Kangiella	kanzonol e	-0.427555	1.39401e-05	negative
Eukaryota_unclassified	ropivacaine	-0.426923	1.43986e-05	negative
Basidiobolus	neobavaisoflavone	-0.426426	1.47699e-05	negative
Idiomarina	sophorapterocarpan a	-0.425526	1.54643e-05	negative
Diversispora	neobavaisoflavone	-0.424346	1.64206e-05	negative
Spizellomyces	kanzonol e	-0.424052	1.6668e-05	negative
Deltaproteobacteria_noname	(cyclohexylmethyl)pyrazine	-0.423473	1.71642e-05	negative
Mortierella	dicaffeoylputrescine	-0.422151	1.83502e-05	negative
Roseovarius	sophoracoumestan a	-0.421772	1.87035e-05	negative
Deltaproteobacteria_noname	16-methyl-6z,9z,12z-heptadecatrienoic acid	0.420936	1.95069e-05	positive
Candidatus_Chloroploca	pentylbenzene	-0.420929	1.95144e-05	negative
Deltaproteobacteria_noname	kanzonol e	-0.420421	2.00182e-05	negative
Holophagae_noname	dicaffeoylputrescine	-0.420043	2.04005e-05	negative
Ceratobasidium	sophoracoumestan a	-0.419503	2.09592e-05	negative
Chlamydia	dicaffeoylputrescine	-0.418462	2.62783e-05	negative
Eukaryota_unclassified	o-methylpongamol	-0.418155	2.24177e-05	negative
Oceanicella	dicaffeoylputrescine	-0.417459	2.32078e-05	negative
Schizosaccharomyces	dicaffeoylputrescine	-0.41686	2.39083e-05	negative
Smittium	ropivacaine	-0.416614	2.42009e-05	negative
Syncephalis	neobavaisoflavone	-0.416287	2.45964e-05	negative
Basidiobolus	kanzonol e	-0.415825	2.51654e-05	negative
Candidatus_Hodgkinia	kanzonol e	-0.414146	2.73363e-05	negative
Basidiobolus	dicaffeoylputrescine	-0.413932	2.7625e-05	negative
Oceanicella	neobavaisoflavone	-0.41325	2.85655e-05	negative
Linderina	sophoracoumestan a	-0.411532	3.10689e-05	negative
Candidatus_Hodgkinia	neobavaisoflavone	-0.410846	3.21242e-05	negative
Saitoella	sophoracoumestan a	-0.409537	3.42321e-05	negative
Kangiella	pentylbenzene	-0.409164	3.48561e-05	negative
Deltaproteobacteria_noname	dicaffeoylputrescine	-0.408809	3.54599e-05	negative
Chlamydia	neobavaisoflavone	-0.406484	4.61941e-05	negative
Schizosaccharomyces	kanzonol e	-0.405378	4.18187e-05	negative
Microbacterium	sophorapterocarpan a	-0.403343	4.6079e-05	negative
Rhizopus	ropivacaine	-0.402852	4.71645e-05	negative
Candidatus_Chloroploca	dicaffeoylputrescine	-0.401538	5.01905e-05	negative
Crocosphaera	16-methyl-6z,9z,12z-heptadecatrienoic acid	0.401219	5.09522e-05	positive
Spizellomyces	neobavaisoflavone	-0.400112	5.36798e-05	negative
Phanerochaete	pentylbenzene	-0.399759	5.45779e-05	negative
Rhizopus	neobavaisoflavone	-0.398989	5.65849e-05	negative
Idiomarina	dicaffeoylputrescine	-0.397953	5.93953e-05	negative
Eukaryota_unclassified	kanzonol e	-0.397728	6.00204e-05	negative
Phanerochaete	sophoracoumestan a	-0.397558	6.04986e-05	negative
Schizosaccharomyces	ropivacaine	-0.397524	6.05958e-05	negative
Syncephalis	kanzonol e	-0.396256	6.42795e-05	negative
Deltaproteobacteria_noname	allylestrenol	0.396058	6.48718e-05	positive
Smittium	(cyclohexylmethyl)pyrazine	-0.395996	6.50573e-05	negative
Syncephalis	ropivacaine	-0.395437	6.67657e-05	negative
Deltaproteobacteria_noname	o-methylpongamol	-0.394878	6.85171e-05	negative
Linderina	o-methylpongamol	-0.392305	7.71344e-05	negative
Deltaproteobacteria_noname	sophorapterocarpan a	-0.391907	7.85545e-05	negative
Holophagae_noname	sophoracoumestan a	-0.391312	8.07213e-05	negative
Microbacterium	neobavaisoflavone	-0.391251	8.09475e-05	negative
Linderina	ropivacaine	-0.391004	8.18675e-05	negative
Phanerochaete	(cyclohexylmethyl)pyrazine	-0.390643	8.3228e-05	negative
Phanerochaete	ropivacaine	-0.390268	8.46619e-05	negative
Oceanicella	sophoracoumestan a	-0.390013	8.56512e-05	negative
Linderina	ptilosteroid b	0.3896	8.72741e-05	positive
Smittium	kanzonol e	-0.389437	8.79227e-05	negative
Linderina	(cyclohexylmethyl)pyrazine	-0.388844	9.03232e-05	negative
Candidatus_Chloroploca	sophoracoumestan a	-0.388414	9.21011e-05	negative
Crocosphaera	o-methylpongamol	-0.387937	9.41089e-05	negative
Basidiobolus	sophoracoumestan a	-0.387861	9.44356e-05	negative
Spizellomyces	16-methyl-6z,9z,12z-heptadecatrienoic acid	0.387734	9.49802e-05	positive
Kangiella	sophoracoumestan a	-0.387686	9.51854e-05	negative
Schizosaccharomyces	(cyclohexylmethyl)pyrazine	-0.387351	9.66352e-05	negative
Ceratobasidium	16-methyl-6z,9z,12z-heptadecatrienoic acid	0.386778	9.91657e-05	positive
Smittium	sophoracoumestan a	-0.386424	0.000100759	negative
Linderina	16-methyl-6z,9z,12z-heptadecatrienoic acid	0.38571	0.000104045	positive
Spizellomyces	dicaffeoylputrescine	-0.384724	0.000108746	negative
Pseudarthrobacter	(cyclohexylmethyl)pyrazine	-0.38441	0.000110284	negative
Roseovarius	16-methyl-6z,9z,12z-heptadecatrienoic acid	0.384034	0.000112154	positive
Candidatus_Hodgkinia	16-methyl-6z,9z,12z-heptadecatrienoic acid	0.383969	0.000112478	positive
Ceratobasidium	ropivacaine	-0.383803	0.000113317	negative
Pseudarthrobacter	o-methylpongamol	-0.383735	0.000113663	negative
Idiomarina	neobavaisoflavone	-0.383417	0.000115281	negative
Smittium	pentylbenzene	-0.382892	0.00011801	negative
Syncephalis	(cyclohexylmethyl)pyrazine	-0.382633	0.000119378	negative
Diversispora	formononetin	-0.382524	0.000119958	negative
Mortierella	ropivacaine	-0.382101	0.000122232	negative
Basidiobolus	ptilosteroid b	0.381682	0.000124525	positive
Crocosphaera	ptilosteroid b	0.381433	0.000125907	positive
Crocosphaera	formononetin	-0.381269	0.000126822	negative
Syncephalis	pentylbenzene	-0.381092	0.000127821	negative
Phanerochaete	o-methylpongamol	-0.380784	0.000129574	negative
Candidatus_Hodgkinia	sophoracoumestan a	-0.380438	0.000131572	negative
Mortierella	sophoracoumestan a	-0.380206	0.000132925	negative
Schizosaccharomyces	pentylbenzene	-0.380151	0.000133245	negative
Diversispora	16-methyl-6z,9z,12z-heptadecatrienoic acid	0.378365	0.000144135	positive
Pseudarthrobacter	16-methyl-6z,9z,12z-heptadecatrienoic acid	0.378289	0.000144612	positive
Spizellomyces	ptilosteroid b	0.378133	0.000145605	positive
Diversispora	ptilosteroid b	0.37786	0.000147356	positive
Ceratobasidium	ptilosteroid b	0.377682	0.00014851	positive
Spizellomyces	sophoracoumestan a	-0.37767	0.000148587	negative
Saitoella	16-methyl-6z,9z,12z-heptadecatrienoic acid	0.377642	0.00014877	positive
Holophagae_noname	neobavaisoflavone	-0.377568	0.000149253	negative
Microbacterium	dicaffeoylputrescine	-0.377543	0.000149415	negative
Deltaproteobacteria_noname	ropivacaine	-0.377501	0.000149691	negative
Linderina	formononetin	-0.377289	0.000151086	negative
Roseovarius	ropivacaine	-0.375735	0.00016167	negative
Roseovarius	(cyclohexylmethyl)pyrazine	-0.374836	0.000168108	negative
Saitoella	o-methylpongamol	-0.374751	0.000168727	negative
Linderina	psoralenol	-0.374461	0.000170859	negative
Ceratobasidium	(cyclohexylmethyl)pyrazine	-0.373956	0.000174633	negative
Diversispora	o-methylpongamol	-0.37321	0.000180351	negative
Syncephalis	16-methyl-6z,9z,12z-heptadecatrienoic acid	0.372992	0.000182055	positive
Roseovarius	o-methylpongamol	-0.372956	0.000182341	negative
Roseovarius	ptilosteroid b	0.371954	0.00019037	positive
Syncephalis	o-methylpongamol	-0.371424	0.00019475	negative
Smittium	o-methylpongamol	-0.370729	0.000200638	negative
Mortierella	(cyclohexylmethyl)pyrazine	-0.370279	0.000204536	negative
Crocosphaera	allylestrenol	0.369856	0.00020826	positive
Syncephalis	sophoracoumestan a	-0.369842	0.000208381	negative
Pseudarthrobacter	formononetin	-0.369316	0.000213103	negative
Smittium	erythrinin c	-0.369229	0.000213902	negative
Chlamydia	sophoracoumestan a	-0.368937	0.000238789	negative
Eukaryota_unclassified	erythrinin c	-0.368915	0.000216776	negative
Oceanicella	ptilosteroid b	0.368528	0.00022037	positive
Kangiella	16-methyl-6z,9z,12z-heptadecatrienoic acid	0.367676	0.000228476	positive
Eukaryota_unclassified	sophoracoumestan a	-0.367388	0.000231287	negative
Mortierella	ptilosteroid b	0.367129	0.000233836	positive
Schizosaccharomyces	16-methyl-6z,9z,12z-heptadecatrienoic acid	0.366829	0.00023682	positive
Spizellomyces	allylestrenol	0.36679	0.000237208	positive
Mortierella	16-methyl-6z,9z,12z-heptadecatrienoic acid	0.366529	0.000239838	positive
Eukaryota_unclassified	pentylbenzene	-0.366433	0.000240806	negative
Syncephalis	ptilosteroid b	0.366051	0.000244714	positive
Ceratobasidium	semilicoisoflavone b	-0.365748	0.000247863	negative
Schizosaccharomyces	sophoracoumestan a	-0.365397	0.00025155	negative
Holophagae_noname	(cyclohexylmethyl)pyrazine	-0.365287	0.000252709	negative
Syncephalis	erythrinin c	-0.364497	0.000261237	negative
Eukaryota_unclassified	ezetimibe	0.363692	0.000270187	positive
Chlamydia	16-methyl-6z,9z,12z-heptadecatrienoic acid	0.36366	0.000296426	positive
Crocosphaera	(cyclohexylmethyl)pyrazine	-0.363256	0.000275159	negative
Kangiella	ptilosteroid b	0.362943	0.000278777	positive
Saitoella	(cyclohexylmethyl)pyrazine	-0.362847	0.000279896	negative
Oceanicella	16-methyl-6z,9z,12z-heptadecatrienoic acid	0.36265	0.000282205	positive
Candidatus_Hodgkinia	o-methylpongamol	-0.362601	0.000282775	negative
Idiomarina	16-methyl-6z,9z,12z-heptadecatrienoic acid	0.361615	0.00029462	positive
Eukaryota_unclassified	16-methyl-6z,9z,12z-heptadecatrienoic acid	0.361374	0.00029758	positive
Saitoella	formononetin	-0.361169	0.000300116	negative
Ceratobasidium	formononetin	-0.361094	0.000301056	negative
Ceratobasidium	allylestrenol	0.360671	0.00030638	positive
Pseudarthrobacter	ropivacaine	-0.360548	0.000307941	negative
Deltaproteobacteria_noname	psoralenol	-0.359744	0.000318344	negative
Ceratobasidium	o-methylpongamol	-0.359695	0.000318991	negative
Schizosaccharomyces	ptilosteroid b	0.359274	0.000324581	positive
Oceanicella	formononetin	-0.358952	0.000328922	negative
Chlamydia	o-methylpongamol	-0.358437	0.000365901	negative
Pseudarthrobacter	semilicoisoflavone b	-0.358194	0.000339329	negative
Idiomarina	kanzonol e	-0.357967	0.000342501	negative
Microbacterium	16-methyl-6z,9z,12z-heptadecatrienoic acid	0.357361	0.000351119	positive
Deltaproteobacteria_noname	n-decanohydroxamic acid	-0.356163	0.000368744	negative
Linderina	semilicoisoflavone b	-0.356154	0.00036888	negative
Roseovarius	allylestrenol	0.355684	0.000376018	positive
Basidiobolus	ropivacaine	-0.355481	0.000379135	negative
Chlamydia	pentylbenzene	-0.355426	0.000412503	negative
Schizosaccharomyces	o-methylpongamol	-0.355265	0.000382488	negative
Mortierella	o-methylpongamol	-0.355183	0.000383763	negative
Holophagae_noname	formononetin	-0.354839	0.000389178	negative
Pseudarthrobacter	ptilosteroid b	0.354591	0.000393104	positive
Roseovarius	formononetin	-0.353906	0.000404182	negative
Crocosphaera	ropivacaine	-0.352838	0.000422018	negative
Pseudarthrobacter	osajin	-0.352558	0.00042681	negative
Basidiobolus	formononetin	-0.352504	0.000427739	negative
Mortierella	formononetin	-0.352415	0.000429274	negative
Candidatus_Hodgkinia	allylestrenol	0.352183	0.000433302	positive
Kangiella	heptabarbital	0.351911	0.000438074	positive
Pseudarthrobacter	allylestrenol	0.351166	0.000451392	positive
Candidatus_Chloroploca	formononetin	-0.35112	0.000452218	negative
Diversispora	semilicoisoflavone b	-0.35086	0.000456956	negative
Kangiella	ropivacaine	-0.350646	0.0004609	negative
Holophagae_noname	o-methylpongamol	-0.350592	0.000461893	negative
Kangiella	formononetin	-0.350428	0.000464935	negative
Crocosphaera	osajin	-0.350179	0.000469606	negative
Mortierella	semilicoisoflavone b	-0.350001	0.000472948	negative
Saitoella	ropivacaine	-0.349742	0.00047787	negative
Saitoella	semilicoisoflavone b	-0.349661	0.000479435	negative
Ceratobasidium	osajin	-0.349412	0.00048421	negative
Kangiella	o-methylpongamol	-0.349272	0.000486922	negative
Saitoella	heptabarbital	0.349006	0.000492119	positive
Crocosphaera	lupalbigenin	-0.348856	0.000495069	negative
Rhizopus	(cyclohexylmethyl)pyrazine	-0.348646	0.000499225	negative
Candidatus_Hodgkinia	pentylbenzene	-0.348542	0.00050129	negative
Schizosaccharomyces	erythrinin c	-0.348079	0.000510616	negative
Saitoella	ptilosteroid b	0.347888	0.000514503	positive
Idiomarina	sophoracoumestan a	-0.347304	0.000526551	negative
Basidiobolus	o-methylpongamol	-0.347281	0.000527028	negative
Oceanicella	o-methylpongamol	-0.347195	0.000528839	negative
Phanerochaete	erythrinin c	-0.34714	0.000529982	negative
Ceratobasidium	psoralenol	-0.346935	0.000534303	negative
Crocosphaera	semilicoisoflavone b	-0.346538	0.00054277	negative
Syncephalis	allylestrenol	0.345747	0.000559985	positive
Roseovarius	semilicoisoflavone b	-0.34556	0.000564132	negative
Eukaryota_unclassified	ptilosteroid b	0.345488	0.000565732	positive
Linderina	allylestrenol	0.345055	0.000575442	positive
Pseudarthrobacter	psoralenol	-0.344895	0.000579084	negative
Rhizopus	ptilosteroid b	0.344592	0.000586017	positive
Eukaryota_unclassified	allylestrenol	0.344165	0.000595924	positive
Diversispora	osajin	-0.344056	0.000598478	negative
Diversispora	allylestrenol	0.343742	0.000605879	positive
Diversispora	psoralenol	-0.342692	0.000631271	negative
Oceanicella	semilicoisoflavone b	-0.342213	0.000643173	negative
Candidatus_Hodgkinia	erythrinin c	-0.341792	0.000653806	negative
Pseudarthrobacter	lupalbigenin	-0.34179	0.000653858	negative
Phanerochaete	ptilosteroid b	0.341186	0.000669413	positive
Mortierella	allylestrenol	0.341165	0.000669945	positive
Holophagae_noname	ropivacaine	-0.340386	0.000690489	negative
Saitoella	allylestrenol	0.339924	0.00070295	positive
Candidatus_Hodgkinia	ptilosteroid b	0.339692	0.000709278	positive
Microbacterium	(cyclohexylmethyl)pyrazine	-0.338912	0.000730971	negative
Smittium	semilicoisoflavone b	-0.338274	0.000749139	negative
Eukaryota_unclassified	lupalbigenin	-0.33822	0.000750712	negative
Phanerochaete	16-methyl-6z,9z,12z-heptadecatrienoic acid	0.338167	0.000752225	positive
Deltaproteobacteria_noname	neobavaisoflavone	-0.338027	0.000756299	negative
Basidiobolus	16-methyl-6z,9z,12z-heptadecatrienoic acid	0.337494	0.000771921	positive
Candidatus_Chloroploca	16-methyl-6z,9z,12z-heptadecatrienoic acid	0.337491	0.000772028	positive
Oceanicella	allylestrenol	0.33726	0.000778902	positive
Spizellomyces	formononetin	-0.336872	0.000790558	negative
Saitoella	lupalbigenin	-0.336079	0.000814897	negative
Idiomarina	allylestrenol	0.335607	0.000829705	positive
Candidatus_Hodgkinia	(cyclohexylmethyl)pyrazine	-0.335465	0.000834196	negative
Oceanicella	osajin	-0.335383	0.000836813	negative
Kangiella	semilicoisoflavone b	-0.334867	0.000853405	negative
Candidatus_Chloroploca	semilicoisoflavone b	-0.334805	0.000855416	negative
Oceanicella	ropivacaine	-0.334541	0.000864043	negative
Diversispora	lupalbigenin	-0.334429	0.00086774	negative
Deltaproteobacteria_noname	semilicoisoflavone b	-0.334296	0.000872112	negative
Schizosaccharomyces	allylestrenol	0.334006	0.000881772	positive
Linderina	erythrinin c	-0.333677	0.000892825	negative
Crocosphaera	psoralenol	-0.333583	0.000896011	negative
Crocosphaera	heptabarbital	0.333461	0.000900184	positive
Diversispora	heptabarbital	0.333379	0.000902976	positive
Eukaryota_unclassified	semilicoisoflavone b	-0.332847	0.000921316	negative
Kangiella	allylestrenol	0.332786	0.000923442	positive
Rhizopus	sophorapterocarpan a	-0.332764	0.000924194	negative
Basidiobolus	(cyclohexylmethyl)pyrazine	-0.332733	0.000925289	negative
Roseovarius	psoralenol	-0.332601	0.000929917	negative
Oceanicella	(cyclohexylmethyl)pyrazine	-0.332554	0.000931559	negative
Roseovarius	osajin	-0.332458	0.000934951	negative
Rhizopus	erythrinin c	-0.332158	0.00094558	negative
Saitoella	osajin	-0.330747	0.000997101	negative
Spizellomyces	ropivacaine	-0.330254	0.00101571	negative
Deltaproteobacteria_noname	sophoracoumestan a	-0.330064	0.00102294	negative
Candidatus_Hodgkinia	semilicoisoflavone b	-0.329983	0.00102604	negative
Eukaryota_unclassified	psoralenol	-0.32997	0.00102656	negative
Holophagae_noname	ptilosteroid b	0.329937	0.0010278	positive
Smittium	formononetin	-0.329861	0.00103076	negative
Linderina	heptabarbital	0.329583	0.00104153	positive
Pseudarthrobacter	erythrinin c	-0.329105	0.00106025	negative
Syncephalis	heptabarbital	0.329083	0.00106112	positive
Roseovarius	lupalbigenin	-0.32899	0.00106483	negative
Saitoella	erythrinin c	-0.328511	0.00108401	negative
Roseovarius	heptabarbital	0.32839	0.00108888	positive
Microbacterium	allylestrenol	0.328016	0.00110415	positive
Microbacterium	ropivacaine	-0.327839	0.00111142	negative
Basidiobolus	heptabarbital	0.327755	0.00111492	positive
Candidatus_Hodgkinia	ropivacaine	-0.327283	0.00113459	negative
Kangiella	(cyclohexylmethyl)pyrazine	-0.327263	0.00113543	negative
Kangiella	erythrinin c	-0.327019	0.00114578	negative
Ceratobasidium	erythrinin c	-0.326594	0.00116391	negative
Phanerochaete	heptabarbital	0.326251	0.00117878	positive
Mortierella	heptabarbital	0.325974	0.00119089	positive
Rhizopus	dicaffeoylputrescine	-0.325829	0.00119731	negative
Idiomarina	pentylbenzene	-0.325087	0.00123051	negative
Holophagae_noname	semilicoisoflavone b	-0.325011	0.00123392	negative
Roseovarius	erythrinin c	-0.324268	0.00126807	negative
Mortierella	erythrinin c	-0.324161	0.00127309	negative
Microbacterium	o-methylpongamol	-0.323981	0.00128151	negative
Spizellomyces	semilicoisoflavone b	-0.323785	0.00129073	negative
Linderina	lupalbigenin	-0.323737	0.00129303	negative
Smittium	psoralenol	-0.323615	0.0012988	negative
Chlamydia	allylestrenol	0.323549	0.00137235	positive
Chlamydia	ptilosteroid b	0.323494	0.00137502	positive
Schizosaccharomyces	heptabarbital	0.323465	0.00130595	positive
Candidatus_Hodgkinia	formononetin	-0.323411	0.00130856	negative
Candidatus_Hodgkinia	heptabarbital	0.323288	0.00131445	positive
Deltaproteobacteria_noname	pentylbenzene	-0.322888	0.00133381	negative
Ceratobasidium	heptabarbital	0.322848	0.00133576	positive
Ceratobasidium	lupalbigenin	-0.3228	0.00133809	negative
Chlamydia	erythrinin c	-0.322273	0.00143637	negative
Chlamydia	heptabarbital	0.322179	0.00144125	positive
Ceratobasidium	n-benzoylaspartic acid	0.322043	0.00137557	positive
Rhizopus	16-methyl-6z,9z,12z-heptadecatrienoic acid	0.321359	0.00141024	positive
Candidatus_Chloroploca	osajin	-0.321335	0.0014115	negative
Saitoella	psoralenol	-0.32112	0.00142255	negative
Eukaryota_unclassified	formononetin	-0.321093	0.00142396	negative
Syncephalis	ezetimibe	0.320765	0.00144097	positive
Basidiobolus	semilicoisoflavone b	-0.320247	0.00146832	negative
Kangiella	psoralenol	-0.31868	0.00155378	negative
Smittium	ptilosteroid b	0.318365	0.00157149	positive
Syncephalis	semilicoisoflavone b	-0.318106	0.0015862	negative
Phanerochaete	allylestrenol	0.317891	0.0015985	positive
Phanerochaete	lupalbigenin	-0.317714	0.0016087	negative
Candidatus_Chloroploca	neobavaisoflavone	-0.317696	0.00160974	negative
Eukaryota_unclassified	osajin	-0.317165	0.00164068	negative
Linderina	osajin	-0.31674	0.00166587	negative
Basidiobolus	allylestrenol	0.316191	0.00169889	positive
Mortierella	psoralenol	-0.315993	0.00171095	negative
Basidiobolus	erythrinin c	-0.315947	0.00171377	negative
Eukaryota_unclassified	n-benzoylaspartic acid	0.315802	0.00172264	positive
Rhizopus	pentylbenzene	-0.315541	0.00173876	negative
Holophagae_noname	osajin	-0.315402	0.00174737	negative
Oceanicella	erythrinin c	-0.314726	0.0017899	negative
Chlamydia	semilicoisoflavone b	-0.31427	0.00190423	negative
Holophagae_noname	heptabarbital	0.314167	0.00182578	positive
Holophagae_noname	16-methyl-6z,9z,12z-heptadecatrienoic acid	0.313702	0.00185611	positive
Chlamydia	formononetin	-0.312954	0.00199319	negative
Candidatus_Chloroploca	o-methylpongamol	-0.312556	0.00193284	negative
Candidatus_Hodgkinia	lupalbigenin	-0.312311	0.00194963	negative
Crocosphaera	erythrinin c	-0.311643	0.00199604	negative
Diversispora	ropivacaine	-0.311397	0.00201333	negative
Oceanicella	lupalbigenin	-0.311387	0.00201408	negative
Syncephalis	lupalbigenin	-0.31137	0.00201526	negative
Spizellomyces	heptabarbital	0.311026	0.00203977	positive
Microbacterium	kanzonol e	-0.31083	0.00205383	negative
Candidatus_Chloroploca	ptilosteroid b	0.310766	0.00205845	positive
Spizellomyces	psoralenol	-0.310535	0.00207514	negative
Pseudarthrobacter	heptabarbital	0.310225	0.00209784	positive
Microbacterium	sophoracoumestan a	-0.310191	0.00210029	negative
Idiomarina	o-methylpongamol	-0.309878	0.00212345	negative
Holophagae_noname	n-benzoylaspartic acid	0.309678	0.00213833	positive
Schizosaccharomyces	n-benzoylaspartic acid	0.309597	0.00214437	positive
Phanerochaete	semilicoisoflavone b	-0.309436	0.00215647	negative
Oceanicella	vanilloylglycine	0.309137	0.00217905	positive
Syncephalis	formononetin	-0.309025	0.00218765	negative
Candidatus_Hodgkinia	psoralenol	-0.308847	0.0022012	negative
Smittium	16-methyl-6z,9z,12z-heptadecatrienoic acid	0.308711	0.00221168	positive
Oceanicella	n-benzoylaspartic acid	0.308351	0.00223956	positive
Spizellomyces	o-methylpongamol	-0.308152	0.00225506	negative
Kangiella	lupalbigenin	-0.308043	0.00226365	negative
Schizosaccharomyces	semilicoisoflavone b	-0.307538	0.00230366	negative
Phanerochaete	formononetin	-0.307501	0.00230663	negative
Saitoella	n-benzoylaspartic acid	0.307334	0.00232005	positive
Basidiobolus	psoralenol	-0.307306	0.0023223	negative
Idiomarina	ropivacaine	-0.307251	0.00232669	negative
Schizosaccharomyces	formononetin	-0.307129	0.00233655	negative
Candidatus_Chloroploca	heptabarbital	0.307099	0.00233902	positive
Rhizopus	kanzonol e	-0.306861	0.00235837	negative
Crocosphaera	n-benzoylaspartic acid	0.306775	0.0023654	positive
Idiomarina	ptilosteroid b	0.306516	0.00238661	positive
Mortierella	lupalbigenin	-0.306461	0.00239118	negative
Phanerochaete	psoralenol	-0.306288	0.00240548	negative
Roseovarius	n-benzoylaspartic acid	0.305655	0.00245863	positive
Mortierella	n-benzoylaspartic acid	0.305506	0.00247122	positive
Oceanicella	psoralenol	-0.305301	0.00248872	negative
Chlamydia	lupalbigenin	-0.30525	0.00259402	negative
Kangiella	n-benzoylaspartic acid	0.304738	0.00253743	positive
Eukaryota_unclassified	n-decanohydroxamic acid	-0.303611	0.00263734	negative
Deltaproteobacteria_noname	erythrinin c	-0.303341	0.00266179	negative
Syncephalis	psoralenol	-0.302738	0.00271715	negative
Idiomarina	erythrinin c	-0.301698	0.00281507	negative
Diversispora	erythrinin c	-0.301497	0.00283437	negative
Chlamydia	psoralenol	-0.301356	0.00295596	negative
Linderina	n-benzoylaspartic acid	0.301226	0.00286059	positive
Candidatus_Chloroploca	allylestrenol	0.300861	0.00289619	positive
Phanerochaete	n-benzoylaspartic acid	0.300626	0.00291932	positive
Rhizopus	allylestrenol	0.300143	0.00296749	positive
Candidatus_Hodgkinia	osajin	-0.299575	0.00302498	negative
Phanerochaete	ezetimibe	0.299557	0.0030268	positive
Idiomarina	heptabarbital	0.29931	0.0030521	positive
Eukaryota_unclassified	heptabarbital	0.298961	0.00308819	positive
Candidatus_Chloroploca	(cyclohexylmethyl)pyrazine	-0.298753	0.00310985	negative
Smittium	heptabarbital	0.298361	0.00315114	positive
Pseudarthrobacter	n-benzoylaspartic acid	0.298325	0.00315501	positive
Mortierella	osajin	-0.297952	0.00319472	negative
Syncephalis	osajin	-0.297475	0.00324624	negative
Holophagae_noname	lupalbigenin	-0.297224	0.0032736	negative
Candidatus_Chloroploca	psoralenol	-0.297035	0.00329434	negative
Smittium	ezetimibe	0.296956	0.00330303	positive
Chlamydia	(cyclohexylmethyl)pyrazine	-0.296758	0.00344165	negative
Basidiobolus	osajin	-0.296691	0.00333243	negative
Holophagae_noname	vanilloylglycine	0.29653	0.0033504	positive
Diversispora	(cyclohexylmethyl)pyrazine	-0.296097	0.00339913	negative
Oceanicella	heptabarbital	0.295518	0.00346536	positive
Microbacterium	ptilosteroid b	0.29539	0.00348017	positive
Holophagae_noname	psoralenol	-0.295059	0.00351859	negative
Spizellomyces	(cyclohexylmethyl)pyrazine	-0.294167	0.00362425	negative
Kangiella	osajin	-0.293366	0.00372155	negative
Smittium	lupalbigenin	-0.292375	0.00384515	negative
Idiomarina	(cyclohexylmethyl)pyrazine	-0.291906	0.00390482	negative
Spizellomyces	osajin	-0.291825	0.00391527	negative
Schizosaccharomyces	lupalbigenin	-0.291052	0.00401579	negative
Idiomarina	psoralenol	-0.290926	0.00403234	negative
Basidiobolus	lupalbigenin	-0.290919	0.00403327	negative
Phanerochaete	osajin	-0.290734	0.00405785	negative
Candidatus_Chloroploca	n-benzoylaspartic acid	0.290509	0.00408776	positive
Idiomarina	formononetin	-0.289103	0.00427961	negative
Roseovarius	vanilloylglycine	0.288567	0.00435475	positive
Candidatus_Chloroploca	vanilloylglycine	0.288459	0.00437007	positive
Schizosaccharomyces	psoralenol	-0.286266	0.00469122	negative
Smittium	allylestrenol	0.284997	0.00488636	positive
Spizellomyces	lupalbigenin	-0.283872	0.00506551	negative
Chlamydia	osajin	-0.281959	0.00552871	negative
Holophagae_noname	erythrinin c	-0.28187	0.00539881	negative
Candidatus_Chloroploca	carapanaubine	0.281081	0.00553536	positive
Candidatus_Chloroploca	lupalbigenin	-0.281081	0.00553536	negative
Basidiobolus	vanilloylglycine	0.280813	0.00558238	positive
Deltaproteobacteria_noname	n-benzoylaspartic acid	0.279914	0.00574298	positive
Spizellomyces	erythrinin c	-0.279719	0.00577842	negative
Spizellomyces	vanilloylglycine	0.279555	0.00580821	positive
Smittium	osajin	-0.279393	0.00583796	negative
Rhizopus	o-methylpongamol	-0.27909	0.00589381	negative
Candidatus_Chloroploca	ropivacaine	-0.278771	0.00595309	negative
Saitoella	ezetimibe	0.278425	0.00601804	positive
Linderina	vanilloylglycine	0.278381	0.00602624	positive
Crocosphaera	vanilloylglycine	0.277143	0.00626404	positive
Idiomarina	semilicoisoflavone b	-0.276895	0.00631267	negative
Syncephalis	n-benzoylaspartic acid	0.276707	0.00634979	positive
Basidiobolus	n-benzoylaspartic acid	0.276405	0.00640969	positive
Holophagae_noname	allylestrenol	0.276222	0.0064462	positive
Ceratobasidium	vanilloylglycine	0.276141	0.00646244	positive
Chlamydia	ropivacaine	-0.276139	0.00661888	negative
Microbacterium	pentylbenzene	-0.276043	0.0064821	negative
Smittium	n-benzoylaspartic acid	0.276025	0.00648586	positive
Schizosaccharomyces	osajin	-0.27567	0.00655763	negative
Microbacterium	psoralenol	-0.275344	0.00662433	negative
Holophagae_noname	ezetimibe	0.274196	0.0068636	positive
Roseovarius	ezetimibe	0.273748	0.00695904	positive
Schizosaccharomyces	ezetimibe	0.273284	0.00705924	positive
Schizosaccharomyces	vanilloylglycine	0.271702	0.00741015	positive
Mortierella	vanilloylglycine	0.271225	0.007519	positive
Diversispora	n-benzoylaspartic acid	0.270066	0.00778926	positive
Rhizopus	semilicoisoflavone b	-0.269531	0.00791682	negative
Candidatus_Hodgkinia	n-benzoylaspartic acid	0.267502	0.00841762	positive
Pseudarthrobacter	vanilloylglycine	0.267441	0.00843308	positive
Rhizopus	sophoracoumestan a	-0.267024	0.00853971	negative
Microbacterium	formononetin	-0.266316	0.00872315	negative
Spizellomyces	n-benzoylaspartic acid	0.265979	0.00881179	positive
Chlamydia	n-benzoylaspartic acid	0.265925	0.00900003	positive
Idiomarina	lupalbigenin	-0.263796	0.00940492	negative
Phanerochaete	n-decanohydroxamic acid	-0.263379	0.0095221	negative
Ceratobasidium	n-decanohydroxamic acid	-0.263252	0.00955806	negative
Rhizopus	heptabarbital	0.262425	0.009795	positive
Deltaproteobacteria_noname	heptabarbital	0.262185	0.00986474	positive
Microbacterium	erythrinin c	-0.261873	0.00995584	negative
Deltaproteobacteria_noname	formononetin	-0.260584	0.0103411	negative
Kangiella	vanilloylglycine	0.260271	0.0104366	positive
Linderina	n-decanohydroxamic acid	-0.26002	0.0105138	negative
Oceanicella	ezetimibe	0.259627	0.0106355	positive
Pseudarthrobacter	n-decanohydroxamic acid	-0.259335	0.0107267	negative
Phanerochaete	vanilloylglycine	0.257833	0.011207	positive
Roseovarius	n-decanohydroxamic acid	-0.255911	0.0118487	negative
Pseudarthrobacter	ezetimibe	0.255029	0.0121538	positive
Rhizopus	formononetin	-0.254501	0.0123399	negative
Microbacterium	lupalbigenin	-0.254428	0.0123656	negative
Rhizopus	psoralenol	-0.25367	0.0126376	negative
Rhizopus	ezetimibe	0.253029	0.0128712	positive
Deltaproteobacteria_noname	osajin	-0.251319	0.0135136	negative
Syncephalis	n-decanohydroxamic acid	-0.24957	0.0141992	negative
Saitoella	vanilloylglycine	0.24912	0.0143804	positive
Microbacterium	n-benzoylaspartic acid	0.248987	0.0144344	positive
Linderina	ezetimibe	0.248826	0.0145002	positive
Ceratobasidium	ezetimibe	0.247537	0.0150341	positive
Microbacterium	semilicoisoflavone b	-0.247112	0.0152137	negative
Ceratobasidium	carapanaubine	0.247018	0.0152537	positive
Holophagae_noname	n-decanohydroxamic acid	-0.246117	0.0156419	negative
Candidatus_Hodgkinia	ezetimibe	0.24608	0.0156584	positive
Schizosaccharomyces	n-decanohydroxamic acid	-0.24593	0.0157239	negative
Crocosphaera	ezetimibe	0.245821	0.0157717	positive
Mortierella	ezetimibe	0.242575	0.0172522	positive
Diversispora	vanilloylglycine	0.241716	0.0176636	positive
Mortierella	n-decanohydroxamic acid	-0.240407	0.0183067	negative
Rhizopus	n-benzoylaspartic acid	0.240227	0.0183965	positive
Candidatus_Chloroploca	erythrinin c	-0.239745	0.0186397	negative
Idiomarina	osajin	-0.23872	0.0191653	negative
Smittium	n-decanohydroxamic acid	-0.238621	0.0192169	negative
Diversispora	carapanaubine	0.238566	0.0192453	positive
Idiomarina	n-benzoylaspartic acid	0.23793	0.0195788	positive
Saitoella	n-decanohydroxamic acid	-0.237216	0.0199595	negative
Roseovarius	carapanaubine	0.237209	0.0199633	positive
Kangiella	ezetimibe	0.237024	0.0200629	positive
Syncephalis	vanilloylglycine	0.236193	0.0205157	positive
Spizellomyces	carapanaubine	0.235666	0.0208077	positive
Microbacterium	osajin	-0.234165	0.0216581	negative
Rhizopus	n-decanohydroxamic acid	-0.233898	0.0218127	negative
Crocosphaera	carapanaubine	0.233821	0.0218575	positive
Microbacterium	heptabarbital	0.23229	0.0227621	positive
Crocosphaera	n-decanohydroxamic acid	-0.231762	0.0230821	negative
Holophagae_noname	carapanaubine	0.231506	0.0232382	positive
Chlamydia	ezetimibe	0.23147	0.0234627	positive
Diversispora	ezetimibe	0.230521	0.023848	positive
Basidiobolus	ezetimibe	0.227307	0.0259333	positive
Rhizopus	vanilloylglycine	0.225252	0.0273464	positive
Oceanicella	n-decanohydroxamic acid	-0.225005	0.0275202	negative
Deltaproteobacteria_noname	lupalbigenin	-0.224298	0.0280244	negative
Pseudarthrobacter	carapanaubine	0.224023	0.0282221	positive
Saitoella	carapanaubine	0.223621	0.0285141	positive
Rhizopus	lupalbigenin	-0.219331	0.0317882	negative
Linderina	carapanaubine	0.219127	0.0319518	positive
Smittium	vanilloylglycine	0.218875	0.0321541	positive
Candidatus_Hodgkinia	n-decanohydroxamic acid	-0.218684	0.0323084	negative
Candidatus_Hodgkinia	vanilloylglycine	0.215344	0.035111	positive
Deltaproteobacteria_noname	ptilosteroid b	0.212971	0.037223	positive
Oceanicella	carapanaubine	0.211717	0.0383815	positive
Eukaryota_unclassified	vanilloylglycine	0.21038	0.0396499	positive
Microbacterium	n-decanohydroxamic acid	-0.208542	0.0414501	negative
Linderina	1-o-[{[(2e)-3,7-dimethyl-2,6-octadien-1-yl]oxy}(hydroxy)phosphoryl]-beta-d-glucopyranose	0.208307	0.0416851	positive
Rhizopus	osajin	-0.206297	0.0437411	negative
Candidatus_Chloroploca	ezetimibe	0.206205	0.0438376	positive
Basidiobolus	carapanaubine	0.20542	0.0446649	positive
Deltaproteobacteria_noname	ezetimibe	0.205334	0.0447564	positive
Idiomarina	ezetimibe	0.204226	0.0459474	positive
Mortierella	carapanaubine	0.203085	0.0472024	positive
Basidiobolus	n-decanohydroxamic acid	-0.202436	0.0479283	negative
Deltaproteobacteria_noname	1-o-[{[(2e)-3,7-dimethyl-2,6-octadien-1-yl]oxy}(hydroxy)phosphoryl]-beta-d-glucopyranose	0.202146	0.0482552	positive
Kangiella	carapanaubine	0.201113	0.0494358	positive
Phanerochaete	carapanaubine	0.199716	0.0510717	positive
Syncephalis	carapanaubine	0.195953	0.0556993	positive
Eukaryota_unclassified	1-o-[{[(2e)-3,7-dimethyl-2,6-octadien-1-yl]oxy}(hydroxy)phosphoryl]-beta-d-glucopyranose	0.194385	0.0577266	positive
Kangiella	n-decanohydroxamic acid	-0.19404	0.05818	negative
Microbacterium	ezetimibe	0.193625	0.05873	positive
Candidatus_Chloroploca	n-decanohydroxamic acid	-0.193398	0.0590322	negative
Chlamydia	n-decanohydroxamic acid	-0.191617	0.0615574	negative
Syncephalis	1-o-[{[(2e)-3,7-dimethyl-2,6-octadien-1-yl]oxy}(hydroxy)phosphoryl]-beta-d-glucopyranose	0.191548	0.0615466	positive
Idiomarina	vanilloylglycine	0.190793	0.0625971	positive
Deltaproteobacteria_noname	vanilloylglycine	0.190629	0.0628275	positive
Diversispora	n-decanohydroxamic acid	-0.186885	0.068273	negative
Microbacterium	vanilloylglycine	0.184319	0.0722202	positive
Phanerochaete	1-o-[{[(2e)-3,7-dimethyl-2,6-octadien-1-yl]oxy}(hydroxy)phosphoryl]-beta-d-glucopyranose	0.184264	0.0723073	positive
Idiomarina	carapanaubine	0.183111	0.0741411	positive
Spizellomyces	n-decanohydroxamic acid	-0.182339	0.075389	negative
Chlamydia	carapanaubine	0.181294	0.0771565	positive
Eukaryota_unclassified	carapanaubine	0.177585	0.0834585	positive
Idiomarina	n-decanohydroxamic acid	-0.177177	0.0841813	negative
Microbacterium	carapanaubine	0.176677	0.085075	positive
Diversispora	1-o-[{[(2e)-3,7-dimethyl-2,6-octadien-1-yl]oxy}(hydroxy)phosphoryl]-beta-d-glucopyranose	0.173971	0.0900401	positive
Schizosaccharomyces	carapanaubine	0.172185	0.093442	positive
Schizosaccharomyces	1-o-[{[(2e)-3,7-dimethyl-2,6-octadien-1-yl]oxy}(hydroxy)phosphoryl]-beta-d-glucopyranose	0.166867	0.104173	positive
Kangiella	1-o-[{[(2e)-3,7-dimethyl-2,6-octadien-1-yl]oxy}(hydroxy)phosphoryl]-beta-d-glucopyranose	0.166862	0.104182	positive
Spizellomyces	ezetimibe	0.166788	0.104338	positive
Mortierella	1-o-[{[(2e)-3,7-dimethyl-2,6-octadien-1-yl]oxy}(hydroxy)phosphoryl]-beta-d-glucopyranose	0.166239	0.1055	positive
Chlamydia	1-o-[{[(2e)-3,7-dimethyl-2,6-octadien-1-yl]oxy}(hydroxy)phosphoryl]-beta-d-glucopyranose	0.162819	0.112886	positive
Ceratobasidium	1-o-[{[(2e)-3,7-dimethyl-2,6-octadien-1-yl]oxy}(hydroxy)phosphoryl]-beta-d-glucopyranose	0.162748	0.113128	positive
Saitoella	1-o-[{[(2e)-3,7-dimethyl-2,6-octadien-1-yl]oxy}(hydroxy)phosphoryl]-beta-d-glucopyranose	0.162449	0.113801	positive
Candidatus_Hodgkinia	1-o-[{[(2e)-3,7-dimethyl-2,6-octadien-1-yl]oxy}(hydroxy)phosphoryl]-beta-d-glucopyranose	0.160553	0.118137	positive
Candidatus_Hodgkinia	carapanaubine	0.159489	0.120625	positive
Roseovarius	1-o-[{[(2e)-3,7-dimethyl-2,6-octadien-1-yl]oxy}(hydroxy)phosphoryl]-beta-d-glucopyranose	0.159477	0.120655	positive
Smittium	carapanaubine	0.159476	0.120657	positive
Crocosphaera	1-o-[{[(2e)-3,7-dimethyl-2,6-octadien-1-yl]oxy}(hydroxy)phosphoryl]-beta-d-glucopyranose	0.158753	0.122371	positive
Chlamydia	vanilloylglycine	0.158641	0.122523	positive
Smittium	1-o-[{[(2e)-3,7-dimethyl-2,6-octadien-1-yl]oxy}(hydroxy)phosphoryl]-beta-d-glucopyranose	0.155003	0.131567	positive
Microbacterium	1-o-[{[(2e)-3,7-dimethyl-2,6-octadien-1-yl]oxy}(hydroxy)phosphoryl]-beta-d-glucopyranose	0.1546	0.132587	positive
Basidiobolus	1-o-[{[(2e)-3,7-dimethyl-2,6-octadien-1-yl]oxy}(hydroxy)phosphoryl]-beta-d-glucopyranose	0.151757	0.139945	positive
Spizellomyces	1-o-[{[(2e)-3,7-dimethyl-2,6-octadien-1-yl]oxy}(hydroxy)phosphoryl]-beta-d-glucopyranose	0.151645	0.14024	positive
Idiomarina	1-o-[{[(2e)-3,7-dimethyl-2,6-octadien-1-yl]oxy}(hydroxy)phosphoryl]-beta-d-glucopyranose	0.144419	0.160365	positive
Holophagae_noname	1-o-[{[(2e)-3,7-dimethyl-2,6-octadien-1-yl]oxy}(hydroxy)phosphoryl]-beta-d-glucopyranose	0.143731	0.162387	positive
Pseudarthrobacter	1-o-[{[(2e)-3,7-dimethyl-2,6-octadien-1-yl]oxy}(hydroxy)phosphoryl]-beta-d-glucopyranose	0.139944	0.173861	positive
Oceanicella	1-o-[{[(2e)-3,7-dimethyl-2,6-octadien-1-yl]oxy}(hydroxy)phosphoryl]-beta-d-glucopyranose	0.138334	0.178913	positive
Rhizopus	carapanaubine	0.134336	0.191926	positive
Candidatus_Chloroploca	1-o-[{[(2e)-3,7-dimethyl-2,6-octadien-1-yl]oxy}(hydroxy)phosphoryl]-beta-d-glucopyranose	0.132484	0.198182	positive
Rhizopus	1-o-[{[(2e)-3,7-dimethyl-2,6-octadien-1-yl]oxy}(hydroxy)phosphoryl]-beta-d-glucopyranose	0.131447	0.201746	positive
Deltaproteobacteria_noname	carapanaubine	0.10673	0.300672	positive
